# Supplementary material
Source: Springer Nature journal article supplement (https://www.springermedizin.de/resource/supplementary/13024_2014_545_MOESM1_ESM.pdf/9644368)
Supplement: MOESM1 [file 9644368]

A

| CORTEX                     |                                                                                                              | FOLD CHANGE |      |      |      |
|----------------------------|--------------------------------------------------------------------------------------------------------------|-------------|------|------|------|
| Gene Symbol                | Entrez Gene Name                                                                                             | M1          | M4   | M6   | M9   |
| 5730416F02Rik              | capping protein (actin filament), gelsolin-like pseudogene                                                   | 4,0         | 2,0  | 1,8  | 1,8  |
| 9930111J21Rik1/Gm12185     | predicted gene 12185                                                                                         | 2,9         | 2,2  | -1,9 | 1,8  |
| AQP1                       | aquaporin 1 (Colton blood group)                                                                             | 1,9         | 2,5  | 1,6  | -2,5 |
| CA8                        | carbonic anhydrase VIII                                                                                      | -1,9        | -1,8 | 1,5  | 2,4  |
| CLIC6                      | chloride intracellular channel 6                                                                             | 4,7         | 2,5  | 1,5  | -1,5 |
| Eci3                       | enoyl-Coenzyme A delta isomerase 3                                                                           | -2,2        | 5,3  | -1,5 | 1,7  |
| FCGR2B                     | Fc fragment of IgG, low affinity IIb, receptor (CD32)                                                        | 1,5         | 1,6  | 1,9  | 3,9  |
| GABBR2                     | gamma-aminobutyric acid (GABA) B receptor, 2                                                                 | -1,5        | 2,6  | -1,7 | 1,8  |
| Gm5878                     | predicted gene 5878                                                                                          | -2,0        | 2,4  | -1,8 | 1,7  |
| IFI16                      | interferon, gamma-inducible protein 16                                                                       | -1,5        | 2,2  | 2,4  | 2,4  |
| KCNE2                      | potassium voltage-gated channel, Isk-related family, member 2                                                | 4,7         | 3,7  | 1,5  | -1,6 |
| KIF12                      | kinesin family member 12                                                                                     | 1,5         | -1,5 | -1,6 | 2,2  |
| MED8                       | mediator complex subunit 8                                                                                   | -1,5        | -1,6 | 2,9  | -1,5 |
| NEGR1                      | neuronal growth regulator 1                                                                                  | -1,5        | 1,5  | -1,6 | 2,1  |
| NKD2                       | naked cuticle homolog 2 (Drosophila)                                                                         | -1,5        | 1,6  | -1,9 | 2,1  |
| OMP                        | olfactory marker protein                                                                                     | 1,7         | 6,2  | 1,6  | -2,7 |
| PAPPA2                     | pappalysin 2                                                                                                 | -1,5        | -1,5 | -1,5 | -2,4 |
| REC8                       | REC8 meiotic recombination protein                                                                           | -1,9        | -2,0 | -2,4 | -2,5 |
| SLC39A4                    | solute carrier family 39 (zinc transporter), member 4                                                        | 1,5         | 2,0  | 1,8  | 1,7  |
| ST6GALNAC1                 | ST6 (alpha-N-acetyl-neuraminy-2,3-beta-galactosyl-1,3)-N-acetylgalactosaminide alpha-2,6-sialyltransferase 1 | -1,9        | 1,6  | -1,5 | 7,1  |
| TOX4                       | TOX high mobility group box family member 4                                                                  | -1,7        | 4,3  | -2,7 | 2,1  |
| Vmn1r188 (includes others) | vomer nasal 1 receptor 217                                                                                   | 1,7         | -1,5 | -1,6 | 2,1  |
| Xlr3c (includes others)    | X-linked lymphocyte-regulated 3C                                                                             | 1,9         | -1,8 | 1,5  | -2,3 |

**B**

| HIPPOCAMPUS   |                                                            | FOLD CHANGE |        |        |        |
|---------------|------------------------------------------------------------|-------------|--------|--------|--------|
| Gene Symbol   | Entrez Gene Name                                           | M1          | M4     | M6     | M9     |
| 5430417L22Rik | RIKEN cDNA 5430417L22 gene                                 | -1,522      | -1,481 | -1,658 | 2,638  |
| A230065H16Rik | RIKEN cDNA A230065H16 gene                                 | 3,897       | 1,581  | 1,58   | 2,093  |
| ACTA2         | actin, alpha 2, smooth muscle, aorta                       | -3,502      | -1,977 | 2,107  | 1,597  |
| ADAMTS2       | ADAM metalloproteinase with thrombospondin type 1 motif, 2 | -1,881      | -1,481 | -1,466 | 1,554  |
| ADI1          | acireductone dioxygenase 1                                 | 1,463       | 1,509  | 1,61   | 1,541  |
| AGA           | aspartylglucosaminidase                                    | -1,462      | -1,461 | 2,153  | 1,724  |
| AGPAT2        | 1-acylglycerol-3-phosphate O-acyltransferase 2             | -1,564      | 1,48   | 1,624  | 1,945  |
| AHNAK         | AHNAK nucleoprotein                                        | -1,547      | 1,876  | 1,568  | 1,785  |
| ALDH1A2       | aldehyde dehydrogenase 1 family, member A2                 | -1,987      | -1,727 | 1,623  | 1,471  |
| ANXA1         | annexin A1                                                 | -1,646      | -1,613 | -1,612 | 1,598  |
| Bst2          | bone marrow stromal cell antigen 2                         | -2,404      | 1,592  | 2,675  | 3,918  |
| CD48          | CD48 molecule                                              | 1,659       | 2,454  | 3,457  | 3,741  |
| CD300LF       | CD300 molecule-like family member f                        | 1,469       | 2,697  | 5,351  | 4,348  |
| CDK5RAP1      | CDK5 regulatory subunit associated protein 1               | -1,642      | -1,581 | -1,505 | -2,166 |
| CNN1          | calponin 1, basic, smooth muscle                           | -3,335      | -2,036 | 1,873  | 1,806  |
| CTSH          | cathepsin H                                                | -1,709      | 2,009  | 1,945  | 2,114  |
| CXCL6         | chemokine (C-X-C motif) ligand 6                           | 1,663       | 2,735  | 1,566  | 5,658  |
| CXCL16        | chemokine (C-X-C motif) ligand 16                          | -1,614      | 1,586  | 3,121  | 2,452  |

|                         |                                                               |        |        |        |        |
|-------------------------|---------------------------------------------------------------|--------|--------|--------|--------|
| EYA2                    | eyes absent homolog 2 (Drosophila)                            | -1,516 | -1,508 | -1,497 | 1,535  |
| FAM46C                  | family with sequence similarity 46, member C                  | -1,964 | 3,689  | 2,398  | 5,958  |
| FOXC2                   | forkhead box C2 (MFH-1, mesenchyme forkhead 1)                | -1,472 | -1,836 | 1,564  | 1,906  |
| GBP6                    | guanylate binding protein family, member 6                    | 3,941  | 1,776  | 2,298  | 3,719  |
| Gm13194                 | predicted gene 13194                                          | 2,496  | 1,473  | 1,538  | -2,027 |
| GMPS                    | guanine monphosphate synthase                                 | -1,551 | -2,187 | -1,668 | -2,791 |
| GPR182                  | G protein-coupled receptor 182                                | -1,547 | -1,8   | 1,681  | 1,739  |
| Gstm6                   | glutathione S-transferase, mu 6                               | -1,46  | -1,49  | -1,688 | -1,715 |
| Gvin1 (includes others) | GTPase, very large interferon inducible 1                     | -1,58  | 1,883  | 1,8    | 3,225  |
| HAVCR2                  | hepatitis A virus cellular receptor 2                         | 1,483  | 2,747  | 2,091  | 2,889  |
| HHEX                    | hematopoietically expressed homeobox                          | -1,476 | 1,539  | 2,002  | 2,497  |
| HLA-A                   | major histocompatibility complex, class I, A                  | -1,476 | 4,177  | 4,236  | 3,88   |
| HLA-DRB5                | major histocompatibility complex, class II, DR beta 5         | -1,718 | -1,466 | 8,292  | 3,382  |
| Ifi2712a/Ifi2712b       | interferon, alpha-inducible protein 27 like 2A                | -2,387 | 1,645  | 2,623  | 4,203  |
| ITIH2                   | inter-alpha-trypsin inhibitor heavy chain 2                   | -1,558 | -1,599 | 1,525  | 1,643  |
| KCNE2                   | potassium voltage-gated channel, Isk-related family, member 2 | -9,745 | 1,687  | -2,029 | 3,19   |
| LDLR                    | low density lipoprotein receptor                              | 1,565  | 1,722  | 1,598  | 2,025  |
| LGALS3                  | lectin, galactoside-binding, soluble, 3                       | -1,947 | 1,788  | 2,726  | 5,693  |
| LGALS3BP                | lectin, galactoside-binding, soluble, 3 binding protein       | -1,995 | 2,412  | 5,04   | 3,715  |
| OXT                     | oxytocin/neurophysin I prepropeptide                          | 2,988  | -1,554 | 2,793  | -7,806 |
| PON3                    | paraoxonase 3                                                 | -2,14  | 2,116  | 1,981  | 3,608  |
| PRKD3                   | protein kinase D3                                             | -1,463 | 1,723  | 1,612  | 1,475  |
| RABGAP1                 | RAB GTPase activating protein 1                               | 3,128  | 1,634  | 1,47   | 3,272  |

|          |                                                                      |        |        |        |        |
|----------|----------------------------------------------------------------------|--------|--------|--------|--------|
| REC8     | REC8 meiotic recombination protein                                   | -1,893 | -1,949 | -2,136 | -2,051 |
| SAMSN1   | SAM domain, SH3 domain and nuclear localization signals 1            | 1,526  | 3,836  | 3,11   | 3,632  |
| SCTR     | secretin receptor                                                    | 1,476  | 1,461  | 2,079  | 2,322  |
| SHC4     | SHC (Src homology 2 domain containing) family, member 4              | 3,572  | 1,606  | 3,286  | 3,329  |
| SLC16A8  | solute carrier family 16 (monocarboxylate transporter), member 8     | -3,607 | 1,56   | 1,681  | 1,943  |
| SLC37A2  | solute carrier family 37 (glucose-6-phosphate transporter), member 2 | -1,809 | 2,078  | 2,641  | 2,72   |
| SLC6A12  | solute carrier family 6 (neurotransmitter transporter), member 12    | -2,277 | -2,96  | 2,498  | 2,118  |
| TLR1     | toll-like receptor 1                                                 | -1,857 | 2,324  | 3,14   | 1,607  |
| TLR2     | toll-like receptor 2                                                 | -1,658 | 3,849  | 4,498  | 6,208  |
| TNFRSF1A | tumor necrosis factor receptor superfamily, member 1A                | -1,459 | 1,683  | 2,216  | 3,385  |
| TOX4     | TOX high mobility group box family member 4                          | -1,511 | 3,315  | 1,622  | -1,547 |
| UCP2     | uncoupling protein 2 (mitochondrial, proton carrier)                 | -1,616 | 1,843  | 2,789  | 1,754  |
| VIM      | vimentin                                                             | -1,511 | 1,588  | 2,029  | 4,634  |
| WFDC2    | WAP four-disulfide core domain 2                                     | -4,709 | 1,582  | -1,748 | 2,139  |
